# Supplementary material
Source: MDPI journal article supplement (https://www.mdpi.com/2227-9717/10/12/2534)
Supplement: s1 [file s1]

# Improving the efficiency and antioxidant activity of essential oil extraction from *Abies sachalinensis* by underwater shockwave pretreatment for the construction of low-energy and sustainable essential oil extraction system

Supporting Materials

Hideaki Kawai <sup>1,2</sup>, Eisuke Kuraya <sup>3,\*</sup>, Akiko Touyama <sup>3</sup>, Osamu Higa <sup>3</sup>, Kazuki Tokeshi <sup>1</sup>, Yoshie Tsujikawa <sup>4</sup>, Kazuyuki Hokamoto <sup>4</sup> and Shigeru Itoh <sup>5</sup>

<sup>1</sup> Graduate School of Science and Technology, Kumamoto University, 2-39-1 Kurokami, Chuo-ku, Kumamoto, 860-8555, Japan

<sup>2</sup> ASAHI GIKEN Inc., 1-17-19 Tokura, Toyonaka, Osaka, 561-0845, Japan

<sup>3</sup> Science and Technology Division, National Institute of Technology, Okinawa College, 905 Henoko, Nago, Okinawa 905-2192, Japan

<sup>4</sup> Institute of Industrial Nanomaterials, Kumamoto University, 2-39-1 Kurokami, Chuo-ku, Kumamoto, 860-8555, Japan

<sup>5</sup> National Institute of Technology, Okinawa College, 905 Henoko, Nago, Okinawa 905-2192, Japan.

\* Correspondence: kuraya@okinawa-ct.ac.jp; Tel.: +81-980-55-4043

## TABLE OF CONTENTS¥

SI-1: Energy evaluation of essential oil extraction by steam distillation of leaves and branches of *Abies sachalinensis*.

### SI-1. Energy evaluation of essential oil extraction by steam distillation of leaves and branches of *Abies sachalinensis*

To evaluate the effect on dried leaves, 1.8 kg of leaves ( $W_{pm}$ ; approximately 1 kg DW) were finely cut, and subjected to steam distillation for 1.5 h. The initial water weight ( $W_w$ ) was 2 kg. As with the fresh samples, leaves receiving shockwave treatment were subjected to steam distillation separately, but in a similar manner. Using steam distillation EO and approximately 0.5 L ( $W_{vc}$ ) of water were extracted. The extracted EO was weighed, and the EO yield ( $W_{EO}$ ) was then calculated in terms of DW (kg).

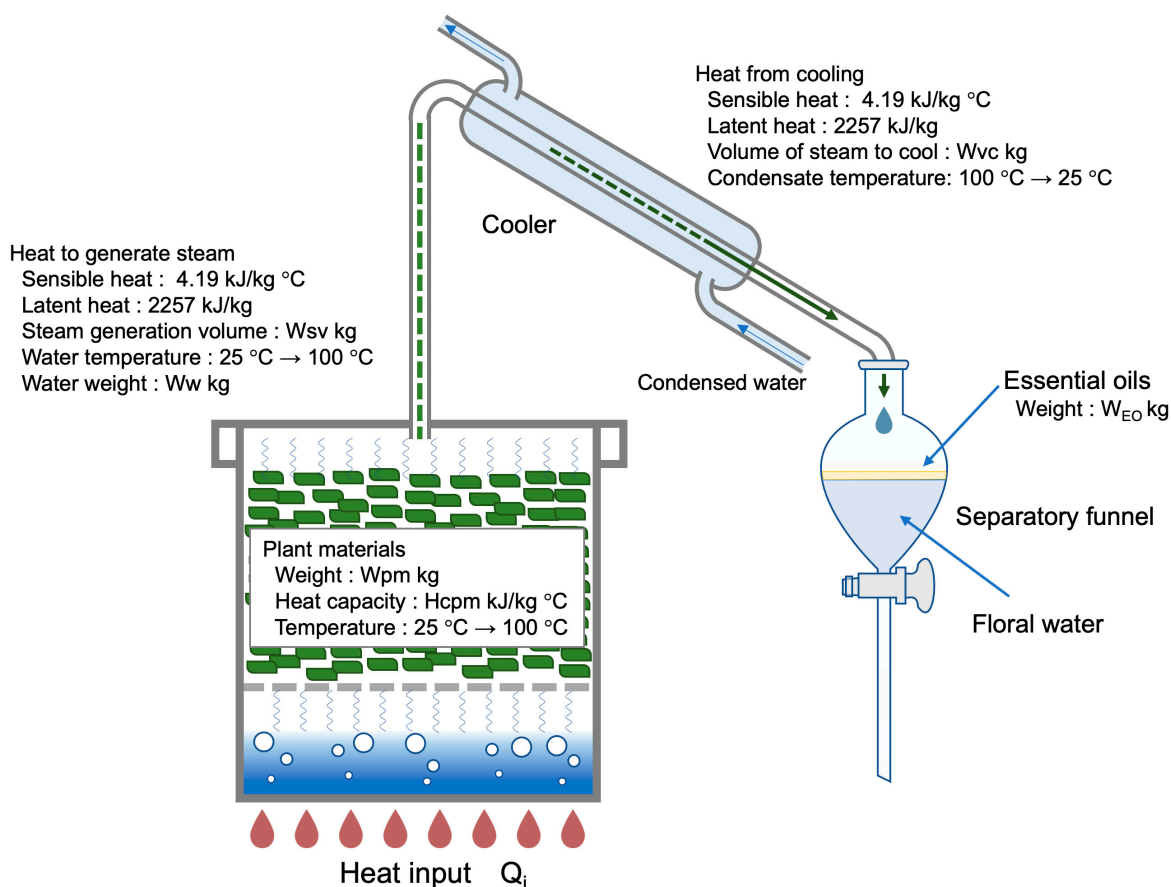

Figure S1. Evaluation of the energy of essential oil extraction by steam distillation of leaves and branches of *Abies sachalinensis*.
